1  
2  
3  
4  
5  
6  
7  
8  
9  
10  
11  
12  
13  
14  
15  
16  
17  
18  
19  
20  
21  
22

**Structural basis for transfer RNA mimicry by a bacterial Y RNA**

Wei Wang<sup>1</sup>, Xinguo Chen<sup>2,3</sup>, Sandra L. Wolin<sup>2,3\*</sup> and Yong Xiong<sup>1,4,\*</sup>

<sup>1</sup>Department of Molecular Biophysics and Biochemistry, Yale University, New Haven, CT 06511, USA

<sup>2</sup>Department of Cell Biology, Yale School of Medicine, New Haven, CT 06536

<sup>3</sup>RNA Biology Laboratory, Center for Cancer Research, National Cancer Institute, Frederick, MD 21702

<sup>4</sup>Lead contact

\*Correspondence: [sandra.wolin@nih.gov](mailto:sandra.wolin@nih.gov), [yong.xiong@yale.edu](mailto:yong.xiong@yale.edu)

Present address: RNA Biology Laboratory, Center for Cancer Research, National Cancer Institute, Frederick, MD 21702

23 **SUMMARY**

24 Noncoding Y RNAs are present in both animal cells and many bacteria. In all species  
25 examined, Y RNAs tether the Ro60 protein to an effector protein to perform various  
26 cellular functions. For example, in the bacterium *Deinococcus radiodurans*, Y RNA  
27 tethers Ro60 to the exoribonuclease polynucleotide phosphorylase, specializing this  
28 nuclease for structured RNA degradation. Recently, a new Y RNA subfamily was  
29 identified in bacteria. Bioinformatic analyses of these YrlA (Y RNA-like A) RNAs  
30 predict that the effector-binding domain resembles tRNA. We present the structure  
31 of this domain, the overall folding of which is strikingly similar to canonical tRNAs.  
32 The tertiary interactions that are responsible for stabilizing tRNA are present in  
33 YrlA, making it a close tRNA mimic. However, YrlA lacks a free CCA end and contains  
34 a kink in the stem corresponding to the anticodon stem. Since nucleotides in the D  
35 and T stems are conserved among YrlAs, they may be an interaction site for an  
36 unknown factor. Our experiments identify YrlA RNAs as a new class of tRNA mimics.

37

38 **Keywords**

39 Y RNA, YrlA, tRNA-like element, noncoding RNA

40

41

## 42 INTRODUCTION

43 In addition to the canonical tRNAs that function in protein synthesis, several  
44 RNAs depend on structural similarity to tRNA in order to function. These tRNA  
45 mimics include the bacterial transfer-messenger RNA (tmRNA) that rescues stalled  
46 ribosomes from mRNAs lacking stop codons and the tRNA-like structures that  
47 contribute to translation and replication of positive-strand RNA viruses. For tmRNA,  
48 the tRNA-like portion undergoes aminoacylation and binds the elongation factor EF-  
49 Tu, allowing it to enter the A-site of arrested ribosomes and function as an acceptor  
50 for the stalled polypeptide (Keiler, 2015). Although the viral tRNA-like sequences  
51 have diverse functions in translation and replication, several are substrates for the  
52 CCA-adding enzyme and a tRNA synthetase and interact with the elongation factor  
53 EF-1A (Dreher, 2009). Additionally, tRNA-like structures at the 3' end of several  
54 mammalian long noncoding RNAs (lncRNAs) are cleaved by the tRNA 5' maturation  
55 enzyme RNase P, resulting in 3' end formation of the upstream lncRNA and release  
56 of a tRNA-like noncoding RNA (ncRNA) of unknown function (Sunwoo et al., 2009;  
57 Wilusz et al., 2008).

58 Another class of RNAs that are proposed to mimic tRNA consists of bacterial  
59 ncRNAs known as YrlA (Y RNA-like A) RNAs (Chen et al., 2014). These ncRNAs are  
60 members of the Y RNA family, 80 to ~220 nucleotides (nt) ncRNAs that were  
61 initially identified in human cells because they are bound by the Ro60 autoantigen, a  
62 major target of autoantibodies in patients with systemic lupus erythematosus  
63 (Wolin et al., 2013). Studies in vertebrate cells revealed that Y RNAs regulate the  
64 subcellular location of Ro60 and its association with other proteins and RNAs. For

65 example, Y RNA binding masks a nuclear accumulation signal on Ro60, retaining it  
66 in the cytoplasm (Sim et al., 2009). Y RNAs also scaffold the association of Ro60 with  
67 other proteins, as binding of the zipcode-binding protein ZBP1 to a mouse Y RNA  
68 adapts the Ro60/Y RNA complex for nuclear export (Sim et al., 2012). Moreover, the  
69 ring-shaped Ro60 binds the 3' ends of some misfolded ncRNAs in its central cavity  
70 and adjacent structured RNA regions on its outer surface (Fuchs et al., 2006; Stein et  
71 al., 2005). Because Y RNAs bind overlapping sites on the Ro60 outer surface, Y RNAs  
72 may regulate the access of misfolded ncRNAs to the Ro60 cavity (Stein et al., 2005).

73         Studies of bacterial Y RNAs have revealed that, as in animal cells, their  
74 functions are intertwined with that of the Ro60 protein. In *Deinococcus radiodurans*,  
75 the bacterium where Ro60 and Y RNAs have been most extensively characterized, at  
76 least two Y RNAs, called Yrn1 (Y RNA 1) and Yrn2, are bound and stabilized by the  
77 Ro60 ortholog Rsr (Ro sixty-related) (Chen et al., 2000; Chen et al., 2013; Chen et al.,  
78 2007). Consistent with co-regulation, these ncRNAs are encoded upstream of Rsr  
79 and on the same DNA strand. One role of Yrn1 is to tether Rsr to the ring-shaped 3'  
80 to 5' exoribonuclease polynucleotide phosphorylase (PNPase), forming a double-  
81 ringed RNA degradation machine called RYPER (Ro60/Y RNA/PNPase  
82 Endonuclease RNP) (Chen et al., 2013). In RYPER, single-stranded RNA threads from  
83 the Rsr ring into the PNPase cavity for degradation, rendering PNPase more  
84 effective in degrading structured RNA (Chen et al., 2013). In addition to its role in  
85 RYPER, Rsr assists 23S rRNA maturation by two 3' to 5' exoribonucleases, RNase II  
86 and RNase PH, during heat stress, where Rsr functions as a free protein, and is

87 inactive when bound to Y RNA (Chen et al., 2007). Thus, in addition to acting as a  
88 tether, Yrn1 may function as a gate to block access of other RNAs to Rsr.

89 Y RNAs are modular, a feature that is critical for carrying out their functions.  
90 All characterized Y RNAs contain a long stem, formed by base-pairing the 5' and 3'  
91 ends of the RNA, that contains the Ro60 binding site. Although in both metazoans  
92 and *D. radiodurans*, the sequences required for Ro60 binding map to a conserved  
93 helix (Chen et al., 2013; Green et al., 1998), a structure of a *Xenopus laevis* (*X. laevis*)  
94 Ro60/Y RNA complex revealed that Ro60 primarily interacts with the 5' strand  
95 (Stein et al., 2005). Consistent with the idea that base-specific interactions with this  
96 strand are critical for Ro60 recognition, only the 5' strand of the helix is conserved  
97 across bacterial species (Chen et al., 2014). The other end of all Y RNAs consists of  
98 internal loops and stem-loops that interact with other proteins. For example, to  
99 form the mammalian Ro60/Y RNA/ZBP1 complex, ZBP1 interacts with the large  
100 internal loop of the Y RNA (Köhn et al., 2010; Sim et al., 2012), while in *D.*  
101 *radiodurans* RYPER, this portion of Yrn1 interacts with the KH and S1 single-  
102 stranded RNA-binding domains of PNPase (Chen et al., 2013). Thus, one role of this  
103 second Y RNA module is to tether Ro60 to an effector protein.

104 Remarkably, for many bacterial Y RNAs, the effector-binding module bears a  
105 striking resemblance to tRNA. The first member of this Y RNA subfamily was  
106 identified in the enteric bacterium *Salmonella enterica* serovar Typhimurium (*S.*  
107 Typhimurium), where it and a second Y RNA were bound by Rsr and encoded 3' to  
108 this protein (Chen et al., 2013). Because the two Y RNAs in *S. Typhimurium*  
109 appeared to represent a separate evolutionary lineage from the more metazoan-like

110 Y RNAs characterized in *D. radiodurans*, these RNAs were designated YrlA and YrlB  
111 (Y RNA-like A and B)(Chen et al., 2013). Homology searches revealed that RNAs  
112 resembling YrlA were widespread, as they were detected near Rsr in >250 bacterial  
113 species representing at least 10 distinct phyla (Chen et al., 2014). Identification of  
114 conserved sequences and secondary structures within these RNAs revealed  
115 similarities to the D, T and acceptor stem-loops of tRNA (Figure 1) (Chen et al.,  
116 2014). Consistent with a tRNA-like fold, *S. Typhimurium* YrlA is a substrate for two  
117 tRNA modification enzymes, TruB and DusA, that modify the T and D loops,  
118 respectively (Chen et al., 2014).

119 To test the hypothesis that the YrlA effector-binding domain folds into a  
120 tRNA-like structure, we determined the structure of the tRNA-like domain of *S.*  
121 *Typhimurium* YrlA by X-ray crystallography. We show that the YrlA effector-binding  
122 domain indeed assumes a similar overall fold as tRNA and that the same tertiary  
123 interactions that stabilize tRNA are present in YrlA. In support of a critical role for  
124 the tRNA-like module, both the ability to fold into a tRNA-like structure and specific  
125 sequences within the structure are conserved in YrlA RNAs from a wide range of  
126 bacteria.

## 127 **RESULTS**

128 We determined the crystal structure of the *S. Typhimurium* YrlA effector-  
129 binding module (nucleotides 15-93) at 3 Å resolution (Figure 1A, Figure S1). To  
130 obtain the high-resolution diffraction data, the 3-nucleotide (nt) loop <sup>56</sup>CCG<sup>58</sup> of YrlA  
131 was changed to a <sup>56</sup>GAAA<sup>58a</sup> tetraloop, where the extra nucleotide was numbered as  
132 58a to maintain the original numbering of the subsequent nucleotides (Figure 1B).



153 ***The overall architecture of S. Typhimurium YrlA resembles that of tRNA***

154           The YrlA RNA folds into a L-shaped structure that is characteristic of tRNAs.  
155 As predicted from the secondary structure (Chen et al., 2014), all tRNA equivalent  
156 regions are present in the YrlA structure, including a stem-loop region resembling  
157 the acceptor stem (AS, nt 50-64), the T stem-loop (TSL, nt 33-49), the D stem-loop  
158 (DSL, nt 67-81), and the anticodon stem (AC, nt 15-27 and 83-93). These structural  
159 elements fold into the L-shaped conformation with the two extended stem-loops  
160 interacting at an angle very similar to that of tRNAs (Figure 1C). The overall YrlA  
161 structure has a backbone RMSD of  $\sim 2.4$  Å to that of *Saccharomyces cerevisiae* (*S.*  
162 *cerevisiae*) tRNA<sup>Phe</sup>, based on the alignment of 52 phosphorus atoms. It was shown  
163 that YrlA RNAs are substrates for tRNA modification enzymes and contain canonical  
164 tRNA modifications such as dihydrouridine in the D loop and pseudouridine in the T  
165 loop (Chen et al., 2014). The high degree of structural similarity between the two  
166 RNAs provides an explanation for the recognition of YrlAs by tRNA modification  
167 enzymes.

168           Deviating from the canonical tRNA structure, there is a kink in the AC region  
169 of YrlA, bending the lower portion of the stem by  $\sim 30$  degrees (Figure 1C). The  
170 region extending from this stem contains the Rsr/Ro60-binding module, making  
171 YrlA much more elongated than tRNA. The two nucleotides responsible for the kink,  
172 <sup>23</sup>UA<sup>24</sup>, are conserved among YrlA family members. However, sequence alignment  
173 indicates that these two nucleotides are predicted to be located in the variable loop  
174 (VL) of most YrlA RNAs, rather than being part of the AC stem (Chen et al., 2014).  
175 Thus, it is unclear whether the kink is a universal feature of YrlA RNAs.



176 A major difference between *S. Typhimurium* YrlA and tRNA is that the AS,  
177 which terminates in 3'-CCA in all mature tRNAs, is instead a closed loop in YrlA.  
178 (Figure 1A). In addition, YrlA lacks the anticodon loop. The length of the AS of YrlAs  
179 varies between species (Chen et al., 2014). For *S. Typhimurium* YrlA, the stem is  
180 only six base pairs, which is one base pair less than that of tRNAs. For other species,  
181 such as some cyanobacteria, this YrlA stem is predicted to be much longer (Chen et  
182 al., 2014). Interestingly, *Mycobacterium smegmatis* YrlA, which resembles *bona fide*  
183 tRNAs in containing a seven-base pair AS, is a substrate for RNase P. Following  
184 cleavage, the fragment corresponding to a tRNA 3' end undergoes exonucleolytic  
185 nibbling and CCA addition (Chen et al., 2014). However, since most YrlA RNAs  
186 contain acceptor stems that are predicted to be poor RNase P substrates, the  
187 majority of YrlA RNAs likely resemble circularly permuted tRNAs with closed loop-  
188 containing acceptor stems (Chen et al., 2014).

### 189 ***YrlA is stabilized by the same tertiary interactions as tRNAs***

190 In addition to the similarities in overall folding, the tertiary interactions that  
191 stabilize the L-shaped structure of YrlA resemble those of tRNA (Figure 2). A major  
192 feature of tRNA folding is the interaction between the DSL and the TSL regions to  
193 form the tRNA elbow, which serves as a binding site for numerous enzymes that  
194 recognize tRNA (reviewed in (Zhang and Ferré-D'Amaré, 2016)). In YrlA, the  
195 interaction between nucleotides U38-A42 of the T loop and two guanines in the D  
196 loop closely mimics the elbow region of tRNA (Figure 2A, 2B). The first two  
197 nucleotides in the YrlA T loop, U38 and U39, stack with nucleotides in the T stem.  
198 The third nucleotide, C40, interacts with G75 in the DSL. There is a gap between the

199 fourth and fifth nucleotides, G41 and A42, in which G74 intercalates to form a  
200 continuous stacking interaction.

201

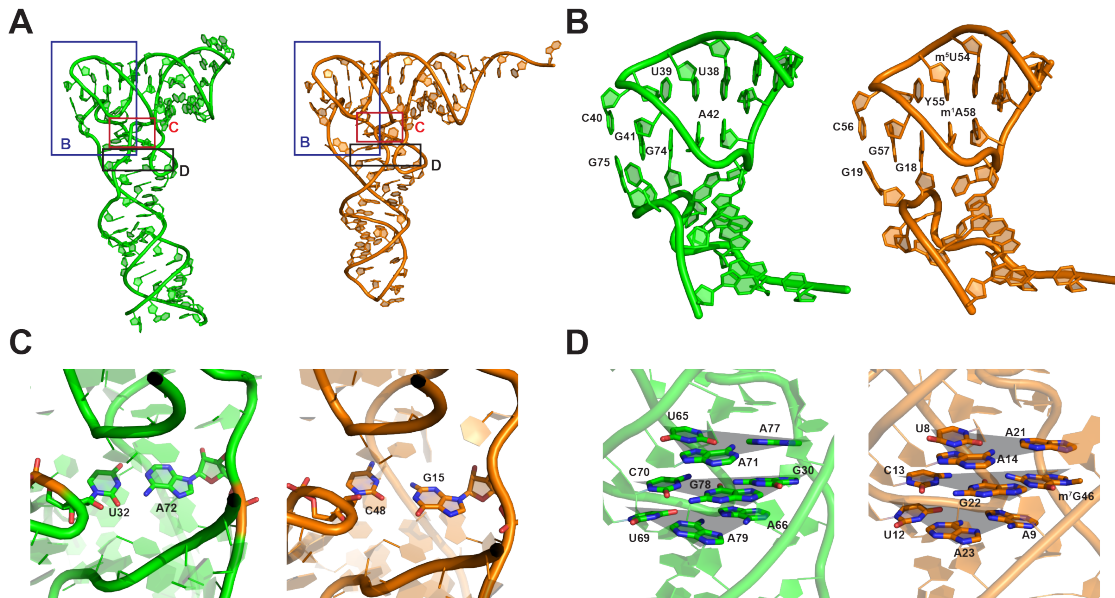

202

203 Figure 2. *S. Typhimurium* YrIA is stabilized by tRNA-like interactions. (A) Overall  
204 structures of *S. Typhimurium* YrIA (Green, PDB: 6cu1) and *S. cerevisiae* tRNA<sup>Phe</sup>  
205 (Orange, PDB: 4tna). The areas shown in (B), (C) and (D) are boxed. (B) YrIA has  
206 DSL-TSL interactions that resemble that of tRNA<sup>Phe</sup>. (C) YrIA contains a Levitt base  
207 pair (A72-U32) similar to that of tRNA<sup>Phe</sup> (G15-C48). (D) U65-A71-A77, C70-G78-  
208 G30 and A66-U69-A79 of YrIA closely resemble the base triples of tRNA<sup>Phe</sup>, U8-A14-  
209 A21, C13-G22-m<sup>7</sup>G46 and A9-U12-A23. The base triples are highlighted by shaded  
210 triangles (gray).

211

212 Other tertiary interactions important for stabilizing tRNA structure are also  
213 present in YrIA. For example, U32:A72 form a base pair equivalent to the Levitt base  
214 pair C48:G15 of tRNA<sup>Phe</sup> (Figure 2C) (Levitt, 1969). This base pair is evolutionarily  
215 conserved in YrIA RNAs (Chen et al., 2014). In addition, in YrIA, U65-A71-A77, C70-  
216 G78-G30 and A66-U69-A79 form three base triplets that stack on one another. The  
217 equivalent base triplets are also found in tRNA<sup>Phe</sup> (Figure 2D).

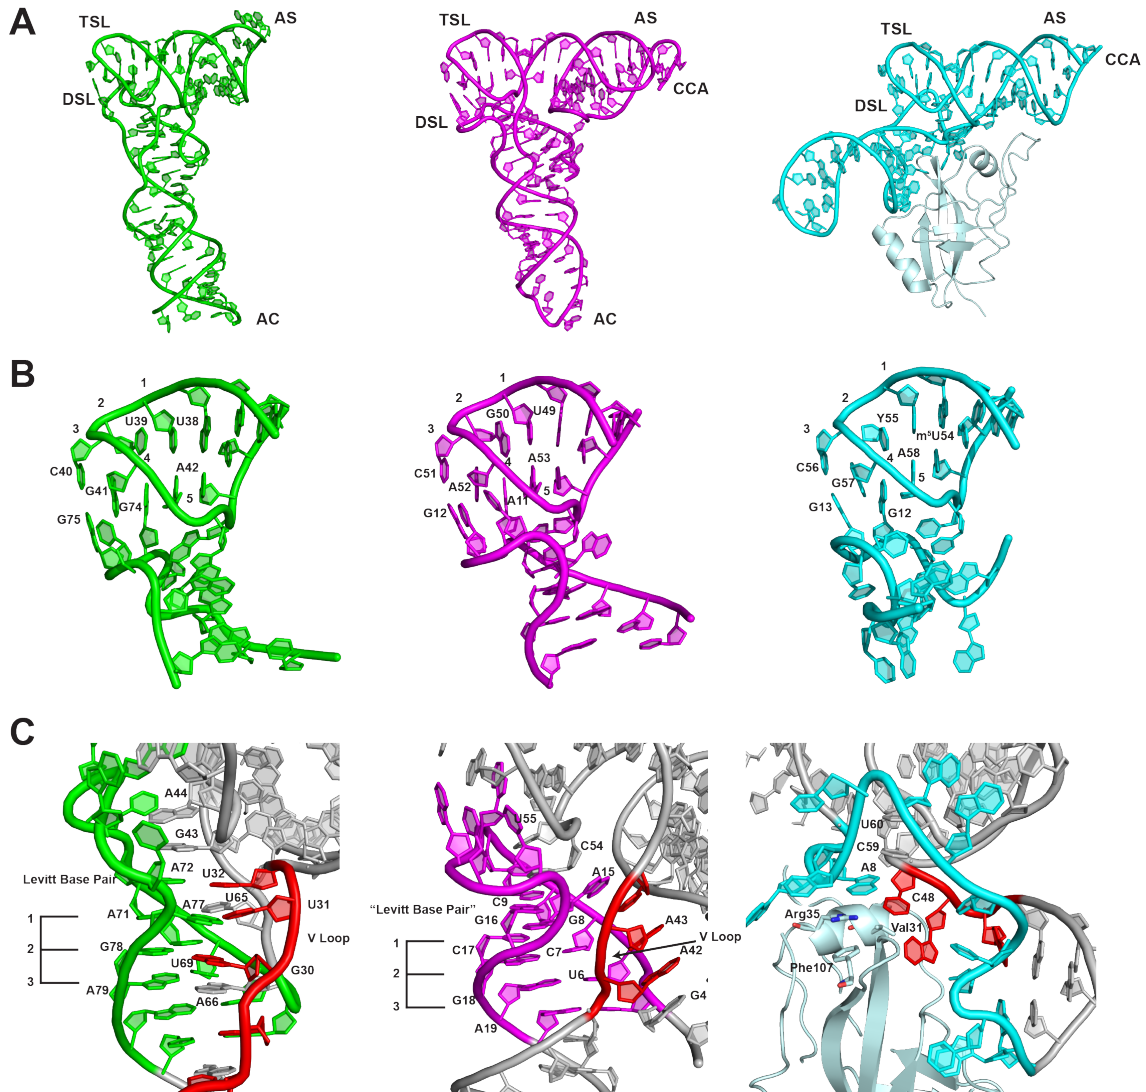

218

219 Figure 3. Comparison of the crystal structures of *S. Typhimurium* YrIA (Green, PDB:  
 220 6cu1), TYMV TLS (Magenta, PDB: 4p5j) and *T. thermophilus* tmRNA-SmpB complex  
 221 (Cyan, PDB: 2czj). (A) The three TLEs share the same overall L-shaped fold. (B) The  
 222 interactions between TSL and DSL are very similar between YrIA, TLS and tmRNA-  
 223 SmpB. (C) The interactions between the VL and DSL show large differences but  
 224 maintain the same architecture in the three TLEs. The VLs are colored in red. The  
 225 three stacking layers of base triples or base pairs are labeled with numbers 1-3.  
 226 [The numbering of TYMV TLS and *T. thermophilus* tmRNA-SmpB complex are based  
 227 on previous publications (Bessho et al., 2007; Colussi et al., 2014)]  
 228

229 With the *S. Typhimurium* YrIA structure reported here, the crystal structures  
 230 of three tRNA-like elements (TLE) have now been determined. The other two TLE

231 structures are *Thermus thermophilus* (*T. thermophilus*) tmRNA and the TLS (tRNA-  
232 like structure) at the 3'-end of the turnip yellow mosaic virus (TYMV) genome  
233 (Bessho et al., 2007; Colussi et al., 2014; Gutmann et al., 2003). These structures  
234 share the L-shaped tRNA fold (Figure 3A) but not all tRNA features are present in all  
235 three TLEs. Notably, tmRNA and TYMV TLS contain free 3'-CCA ends and anticodon  
236 domain mimics (in the case of tmRNA, a portion of its SmpB protein partner  
237 substitutes for the anticodon stem-loop) (Bessho et al., 2007; Gutmann et al., 2003)  
238 (Figure 3A). The presence of these structural features is consistent with the ability  
239 of these two TLEs to be charged with amino acids and with their biological functions  
240 (Dreher, 2009; Keiler, 2015).

241         The DSL-TSL interaction is well conserved among the three TLEs (Figure 3B).  
242 This is perhaps not surprising as this is a major interaction defining the tRNA fold.  
243 In all cases, two guanine nucleotides in the DSL interact with a T loop through  
244 hydrogen bonding and base stacking interactions (Figure 3B). Since these three  
245 molecules have completely different evolutionary trajectories, the highly similar  
246 DSL-TSL interaction and hence the tRNA-like fold must be a key feature of their  
247 function, such that all three TLEs have either retained it (in the case of YrlA and  
248 tmRNA, which may have evolved from tRNA), or convergently evolved to acquire it  
249 (viral TLEs).

250         In contrast, the interactions between the DSL and the VL regions are quite  
251 different for the three TLEs. In YrlA, the nucleotides in the DSL region interact with  
252 the VL region and form three base-triplet layers, which are very similar to that of  
253 canonical tRNAs. These three base layers further stack with the Levitt base pair

254 A72-U32 and with two nucleotides in the T loop, G43 and A44, stabilizing the L-  
255 shaped fold (Figure 3C). TYMV TLS uses a different strategy to stabilize the tRNA-  
256 like fold. Its VL does not interact with the DSL. Instead, all three residues in the VL  
257 (A42, A43 and U44) flip out to form a continuous stack with A3, G4 and A15. As a  
258 consequence, the nucleotides in the D stem form three base pairs instead of base  
259 triplets. Nonetheless, the DSL base pairs maintain a stacking interaction with two  
260 nucleotides in the T loop (C54 and U55) via a Levitt base pair equivalent (G16-C9)  
261 (Figure 3C). Strikingly, these interactions are also mimicked in the case of tmRNA  
262 but are conveyed through the SmpB protein, where Val 31, Arg35 and Phe107  
263 bridge the base-pairing and stacking interactions. The completely different  
264 strategies used by the three TLEs to stabilize the VL-DSL connection highlight the  
265 importance of this region in maintaining the tRNA-like fold. These differences are  
266 also consistent with the fact that most tRNA-binding factors do not recognize this  
267 portion of tRNAs.



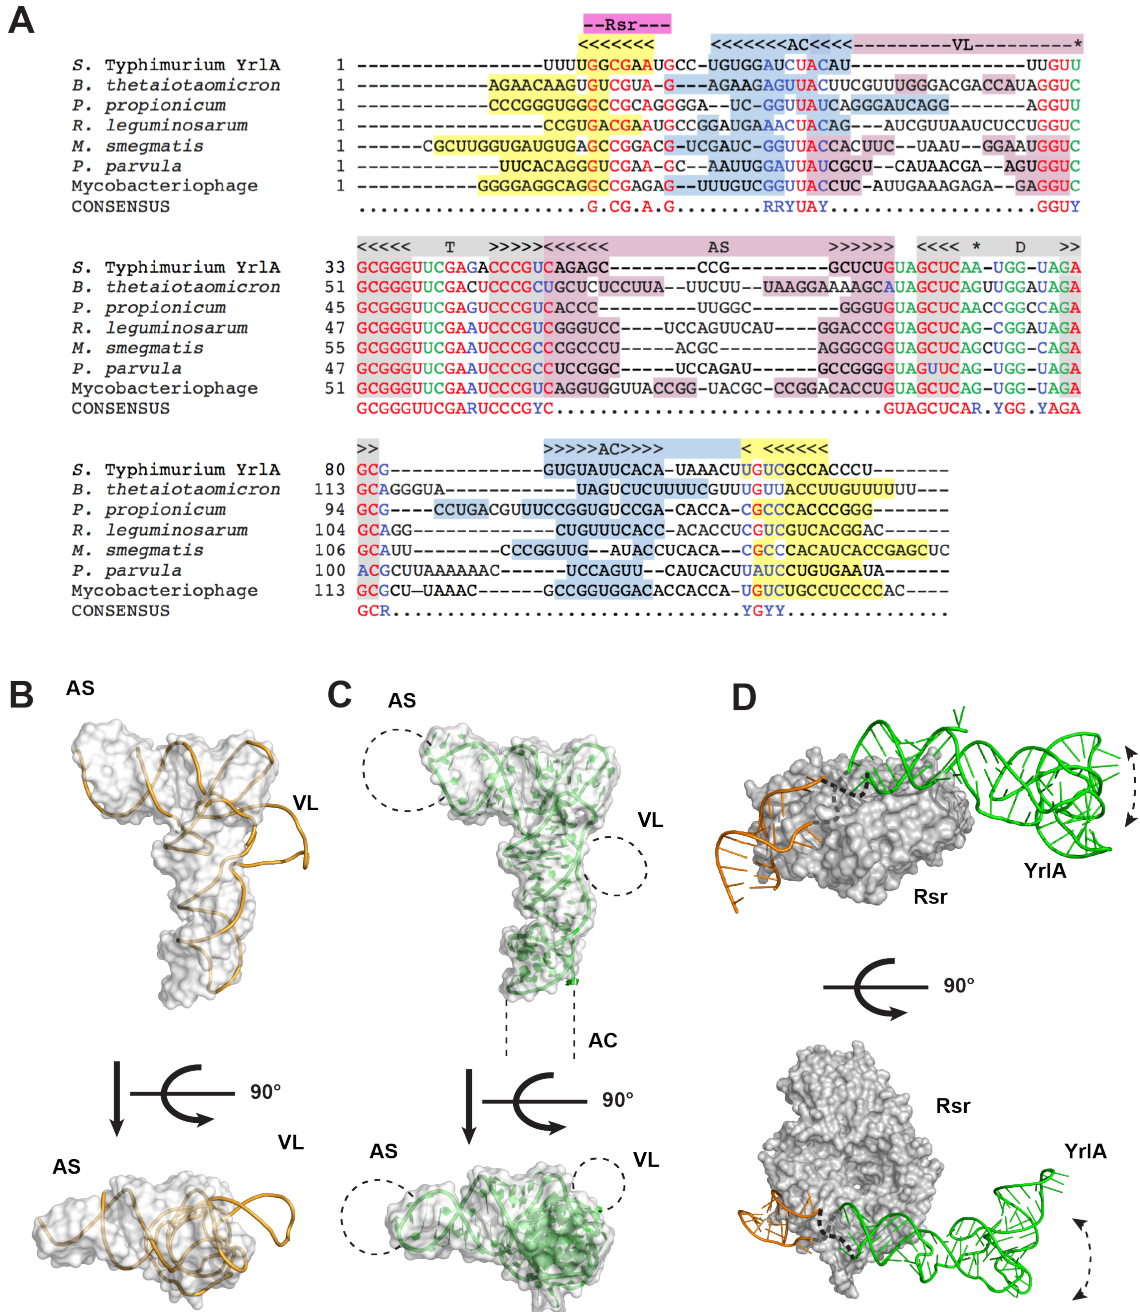

268

269 Figure 4. YrlA from various species likely share the same tRNA-like fold. (A)  
 270 Sequences of representative YrlA RNAs were aligned using Clustal Omega (Goujon et  
 271 al., 2010; Sievers et al., 2011) and further adjusted manually. The positions of the  
 272 DSL and TSL are indicated in gray above the alignments and nucleotides that  
 273 basepair to form the D- and T-stems are shaded gray. The positions of the AS and VL  
 274 are indicated in pink, the AC is labeled light blue and the Rsr binding site is indicated  
 275 with magenta. Nucleotides with the potential to form helices within the stem

276 created by basepairing the 5' and 3' ends are highlighted light blue and yellow.  
277 Nucleotides conserved in YrlA RNAs are in red, with conserved nucleotides  
278 important for maintaining tertiary tRNA-like structure in green. Conserved  
279 nucleotides that are either purines or pyrimidines in YrlA RNAs are in blue. The  
280 shaded nucleotides in the VL region can potentially form duplexes. Nucleotides  
281 forming Levitt base pair are indicated with a star. (B) The structure of a  
282 representative class II tRNA, *T. thermophilus* tRNA<sup>Tyr</sup> (1h3e, chain B, yellow) was  
283 superimposed onto the *S. Typhimurium* YrlA structure (gray surface). (C) Schematic  
284 model of a generalized YrlA RNA. The *S. Typhimurium* YrlA structure is shown as  
285 both cartoon (green) and gray surface. The different sizes of the AS, VL and AC  
286 regions are represented with dashed lines. (D) Model of the *S. Typhimurium* Rsr-  
287 YrlA complex. *X. laevis* Ro in complex with its Y RNA fragment (PDB: 1yvq) was used  
288 as a model for Rsr (gray surface) and the YrlA Rsr/Ro60 binding module (bright  
289 orange). The effector-binding module of YrlA is shown in green.  
290

291 ***The YrlA effector domain consists of a conserved tRNA core with variable stems***  
292 ***and loops***

293 A sequence alignment of YrlAs from various bacteria shows that the  
294 nucleotides involved in stabilizing the tertiary interactions are highly conserved  
295 (Figure 4A). These nucleotides include those in the D and T loops, the pyrimidine at  
296 the last position of the VL and the <sup>65</sup>UA<sup>66</sup> dinucleotide that connects the AS and the  
297 DSL. Most YrlA species also maintain the Levitt base pair (Levitt, 1969) that is  
298 important for stabilizing the L-shaped structure (<sup>32</sup>U and <sup>72</sup>A in *S. Typhimurium*  
299 YrlA). Thus, we predict that YrlAs from other species will have the same overall  
300 tRNA-like fold as observed in the current structure.

301 Although *S. Typhimurium* YrlA has a short VL, many YrlA species contain the  
302 long VLs (Figure 4A) that are characteristic of class II tRNAs. When a representative  
303 class II tRNA structure was superimposed on the structure of *S. Typhimurium* YrlA,  
304 only the VL protrudes from the L-shaped volume defined by this YrlA (Figure 4B).  
305 Class II tRNA VLs contain short duplexes, which could also exist in YrlA species with

306 long VLS (Figure 4A). In addition, the sequence alignment indicates that the AS of  
307 YrlA RNAs vary in both sequence and length, as does the portion of the YrlA that  
308 corresponds to the AC. These comparisons support a model in which the YrlA core  
309 folds into a conserved tRNA-like structure, while the sizes of the AS, AC and VL  
310 regions vary (Figure 4C).

### 311 ***Potential interactions of YrlA RNA with cellular factors***

312 Interestingly, although sequences within the D and T stems are not required  
313 to maintain the tRNA L-shape, these nucleotides are conserved in YrlA RNAs (Figure  
314 4A). This suggests that the YrlA D and T stems are under evolutionary selection  
315 pressure. Most aminoacyl-tRNA synthetases recognize the AC and the AS (Giegé and  
316 Eriani, 2014). In addition, the tRNA elbow, where the D and T loops interact, is  
317 recognized by the ribosome, ncRNAs and many tRNA-interacting proteins (Zhang  
318 and Ferré-D'Amaré, 2016). To our knowledge, no cellular factors have been shown  
319 to function by recognizing specific sequences within the T and D stems of tRNAs or  
320 TLEs. The sequence conservation in this region suggests that YrlA RNAs may  
321 interact with a novel factor that recognizes specific sequences in these stems.

322 We compared available structural information to gain insight into the  
323 possible architecture of the Rsr-YrlA. YrlA RNAs contain a conserved Rsr/Ro60-  
324 binding module (Figure 1A); hence the structure of the Rsr-YrlA module is believed  
325 to resemble that of the *X. laevis* Ro60-Y RNA complex (PDB: 1yvp) (Stein et al., 2005).  
326 For *S. Typhimurium* YrlA, the tRNA-like effector-binding module, with structure  
327 reported herein, is connected to the Rsr/Ro60-binding module by unpaired short  
328 loops of 5 nucleotides. This allows us to model the Rsr-YrlA complex by positioning



329 our structure close to the upper surface of the *X. laevis* Ro60-Y RNA structure  
330 (Figure 4D, upper panel). This surface of Ro60 presents positive charges that were  
331 shown to be important for both Y RNA and misfolded 5S rRNA binding (Fuchs et al.,  
332 2006; Stein et al., 2005). Thus, as predicted for vertebrate Y RNAs and Ro60, YrlA  
333 could serve as a gatekeeper to regulate access of other RNAs to Rsr.

334 The unknown effector factor that binds YrlA is presumably bound to the  
335 elbow region of the YrlA tRNA-like domain, more specifically, the T stem and the D  
336 stem. In the presence of misfolded RNA and/or the effector protein, the tRNA-like  
337 domain of YrlA may reposition. For instance, the architecture of the *D. radiodurans*  
338 RYPER has been determined by single particle electron microscopy (EM) and the Y  
339 RNA is predicted to bend downward from the Rsr surface, allowing the stemloop-  
340 containing module to contact one or more S1/KH domains of PNPase (Chen et al.,  
341 2013). The architecture of the *S. Typhimurium* Rsr-YrlA-effector complex remains to  
342 be determined.

## 343 **DISCUSSION**

344 Although the structure of the metazoan Y RNA module that binds the Ro60  
345 autoantigen was elucidated using X-ray crystallography (Stein et al., 2005), high  
346 resolution structures of the effector-binding domains of these RNAs have been  
347 lacking. Our crystal structure of the tRNA-like module of *S. Typhimurium* YrlA RNA  
348 reveals that this module not only adopts an overall L-shaped structure similar to  
349 tRNA, but is also stabilized by the same tertiary interactions. Since all sequences  
350 involved in critical tertiary interactions are strongly conserved in YrlA RNAs, we  
351 predict that the ability to fold into the canonical tRNA L-shape is a general feature of

352 this Y RNA family. Moreover, the high degree of sequence conservation at the YrlA  
353 region corresponding to the tRNA elbow, particularly within the T and D stems,  
354 contrasts with the variable sizes of the AS, AC and VL regions. Based on the extreme  
355 conservation of these T and D stem sequences, we expect that the effector(s) that  
356 bind YrlA RNAs will be one or more tRNA-binding protein(s) that recognize the  
357 elbow region with some sequence specificity.

358         The strong resemblance of YrlA RNAs to tRNAs lends support to the proposal  
359 that YrlA and other Y RNAs evolved from tRNA (Chen et al., 2014). Consistent with  
360 this hypothesis, Y RNAs are encoded adjacent to one or more tRNAs in some  
361 bacteria (Chen et al., 2014). Additionally, the finding that YrlA RNAs differ from *bona*  
362 *fide* tRNAs in that the TSL occurs 5' to the DSL supports a recent model in which  
363 these RNAs originated from dimeric tRNA transcripts (Sim and Wolin, 2018). In this  
364 model, the YrlA TSL derived from the first tRNA, while the DSL derived from the  
365 second tRNA. Since the YrlA AS would originate from the spacer between the two  
366 tRNAs, a model in which YrlA evolved multiple times in distinct bacteria would  
367 provide an explanation for the variable length of this stem. Alternatively, if YrlA  
368 evolved from a single primordial dimeric tRNA, there may have been less pressure  
369 to maintain the length of the AS. In either case, the additional sequences in a dimeric  
370 pre-tRNA, such as the DSL and AC of the first tRNA and the AC and TSL of the second  
371 tRNA, could potentially basepair to form a stem containing a sequence recognized  
372 by Ro60.

373         In certain algae and at least one archaeal species, some tRNAs are  
374 transcribed as circularly permuted variants that are processed to mature tRNAs

375 (Chan et al., 2011; Maruyama et al., 2010; Soma et al., 2007). Some of these pre-  
376 tRNAs resemble YrlA in that the AS is initially a closed loop and the AC stem is  
377 initially formed by base pairing the 5' and 3' ends of the newly made RNA. These  
378 unusual pre-tRNAs are processed to canonical tRNAs by excising and ligating the  
379 extended AC stem to form a circular intermediate, followed by opening of the AS by  
380 endonucleases such as RNase P and/or RNase Z (Soma et al., 2007). Although  
381 enzymes equivalent to the eukaryotic and archaeal splicing endonucleases have not  
382 been reported in bacteria, the resemblance of YrlA RNAs to circularly permuted  
383 tRNAs raises the possibility that some YrlA RNAs could undergo processing to more  
384 closely resemble canonical tRNAs.

385         The tRNA resemblance is less evident for Yrn1 RNAs: however, these ncRNAs  
386 also contain some tRNA-like features. Yrn1 can be folded to contain a TSL that  
387 conserves the T stem sequences of YrlA RNAs (Chen et al., 2014). This TSL likely  
388 forms *in vivo*, as it contains pseudouridine at the position corresponding to the  
389 pseudouridine in TSLs of all canonical tRNAs (Chen et al., 2014). Since structures have  
390 not been reported for the effector-binding domain of Yrn1 or any metazoan Y RNAs, it  
391 remains possible that the three stem loops in the Yrn1 effector-binding domain fold in  
392 three-dimensions to mimic tRNA.

393         Although the exact role of YrlA RNA is unknown, it is likely that it functions in  
394 RNA degradation and/or repair. Consistent with a role in RNA degradation, some  
395 YrlA and Rsr co-purify with PNPase in *S. Typhimurium* (Chen et al., 2013). If, as  
396 described for Yrn1 (Chen et al., 2013), the YrlA effector-binding domain interacts  
397 with the S1 and KH domains of PNPase, the highly folded tRNA domain could serve

398 to protect the RNA from endonucleolytic nicks that would render it a substrate for  
399 PNPase or other exoribonucleases.

400 Rsr, YrlB and YrlA have also been proposed to function in RNA repair, since  
401 they are encoded adjacent to the RtcB RNA ligase in many bacteria (Burroughs and  
402 Aravind, 2016; Chen et al., 2013; Das and Shuman, 2013). In some bacteria,  
403 including *S. Typhimurium*, this operon (*rsr-yrlB -rtcBA*) encodes both RtcB, the  
404 ligase that joins pre-tRNA halves following intron excision in Archaea and  
405 metazoans (Englert et al., 2011; Popow et al., 2011; Tanaka et al., 2011; Tanaka and  
406 Shuman, 2011), and RtcA, an RNA terminal phosphate cyclase (Das and Shuman,  
407 2013; Filipowicz et al., 1985). Although the substrates of RtcB in bacteria are largely  
408 unknown, *E. coli* RtcB repairs 16S rRNA following cleavage by the MazF toxin  
409 (Temmel et al., 2017). Because Rsr and Y RNAs are encoded adjacent to RtcB in  
410 bacteria from multiple phyla, it was proposed that Rsr and one or more Y RNAs  
411 function as cofactors to enhance RtcB activity (Burroughs and Aravind, 2016).  
412 Consistent with a more general role in RNA ligation, Rsr and YrlA are occasionally  
413 encoded adjacent to members of other RNA ligase families.

414 Interestingly, in certain other bacteria, RtcB is encoded adjacent to a protein  
415 containing a Band-7 domain and a predicted ncRNA, called band 7-associated tRNA  
416 (b7a-tRNA), that strongly resembles an authentic tRNA (Burroughs and Aravind,  
417 2016). Consistent with functional redundancy between b7a-tRNA and YrlA, these  
418 bioinformatics searches predict that occasionally b7a-tRNA is encoded adjacent to  
419 Rsr and YrlA is adjacent to the Band-7 domain protein. Although the existence of the  
420 putative b7a-tRNA has not been validated experimentally, these predictions,

421 together with our finding that the YrlA effector-binding domain folds similarly to  
422 tRNA, support the hypothesis that tRNA-like molecule(s) contribute, directly or  
423 indirectly, to RNA ligation.

## 424 **MATERIALS AND METHODS**

### 425 ***Plasmid construction and RNA purification***

426 The tRNA-like domain of *S. Typhimurium* YrlA was cloned into the EcoRI and  
427 NheI sites of plasmid pHDV4 (Walker et al., 2003), such that the YrlA coding  
428 sequence was followed by the HDV ribozyme. *S. Typhimurium* YrlA was transcribed  
429 from HindIII-linearized plasmid using T7 RNA polymerase (Milligan et al., 1987).

430 The transcription reaction was mixed with an equal volume of ribozyme denaturing  
431 buffer (8M Urea and 0.5M MgCl<sub>2</sub>) and incubated at 37 °C for 2h to increase HDV  
432 ribozyme cleavage efficiency (Rosenstein and Been, 1990). Following T7  
433 transcription and HDV cleavage, the sequence of the resulting RNA is:

434 GGGUGGCUCUACAUUUGUUGCGGGUUCGAGACCCGUCAGAGCCCGGCUCUGUAGCUC  
435 AAUGGUAGAGCGGUGUAGUCACC. The underlined nucleotides indicate modifications  
436 to the original YrlA sequence in order to stabilize the AC stem. The YrlA product was  
437 precipitated with ethanol and purified by polyacrylamide-urea gel electrophoresis.  
438 YrlA variants were made using QuikChange Site-Directed Mutagenesis (Agilent).

### 439 ***Crystallization and data collection***

440 The purified YrlA RNAs were folded by heating to 95 °C for 2 min,  
441 transferring to 60 °C and incubating for 2 min. MgCl<sub>2</sub> was added at 60°C to a final  
442 concentration of 10 mM and the reaction was quenched on ice for 30 min before  
443 use. The folded RNA was then buffer exchanged to RNA crystallization buffer (50

444 mM sodium cacodylate, 50 mM KCl, 1 mM MgCl<sub>2</sub> and 0.1 mM EDTA) using Amicon  
445 Ultra Centrifugal Unit (Merck Millipore, Billerica, MA). The RNA was concentrated to  
446 a final concentration of 1.2-1.5 mg/ml and screened for crystals using the  
447 microbatch under oil method using the Nucleix Suite (Qiagen, Germantown, MD).  
448 Crystals were readily formed under numerous conditions overnight.

449 Three YrlA variants were crystallized, namely YrlA WT, YrlA Tetraloop and  
450 YrlA Tetraloop 3C, in which an additional cytosine was added to the 3'-end of YrlA  
451 Tetraloop. The best crystallization conditions for each YrlA constructs were  
452 summarized in Table S1. Crystals were cryoprotected by Paratone oil (Hampton  
453 Research, Aliso Viejo, CA) or 30% glycerol. Diffraction data was collected at the  
454 Advanced Photon Source beamlines 24ID-C and 24ID-E. The data statistics are  
455 summarized in Table 1.

#### 456 ***Structure determination and refinement***

457 The structure of YrlA RNA was determined by a combination of single-  
458 wavelength anomalous dispersion (SAD) and molecular replacement. The initial  
459 phase information was obtained by SAD phasing using SHELX C/D/E (Sheldrick,  
460 2008) from a data set collected on an Iridium hexamine derivative of the YrlA-  
461 Tetraloop-3C crystal. A preliminary model was built and used as the search model  
462 for the YrlA-Tetraloop data set using Phaser (McCoy et al., 2007). There is one RNA  
463 molecule in the asymmetric unit of the crystal. The initial model was refined by  
464 iterative rounds of restrained refinement using re mac5 (Vagin et al., 2004)  
465 followed by manual rebuilding with Coot (Emsley and Cowtan, 2004). B-factor  
466 sharpening was performed to facilitate model building (Liu and Xiong, 2014). The

467 structure was refined to final R/R-free of 21.3%/23.4% with excellent electron  
468 density (Figure S1). Refinement statistics are summarized in Table 1.

469

#### 470 **ACKNOWLEDGEMENTS**

471 The authors would like to thank the staff at the Advanced Photon Source beamline  
472 24-ID for assistance in data collection. This work was supported by National  
473 Institutes of Health Grants R01AI116313 (Y.X.) and R01GM073863 (to S.L.W.) and  
474 by the Intramural Research Program, Center for Cancer Research, National Cancer  
475 Institute, National Institutes of Health (X.C. and S.L.W.).

476 The authors declare no conflicts of interest.

#### 477 **AUTHOR CONTRIBUTIONS**

478 X.C., S.W., and Y.X. conceived the project. W.W., X.C., S.W. and Y.X. designed the  
479 experiments. W.W. and X.C. purified the YrlA RNAs and W.W. crystalized the RNA  
480 and collected the X-ray diffraction data. W.W. and Y.X. determined the structure.  
481 W.W., X.C., S.W. and Y.X. analyzed the data and prepared the manuscript.

#### 482 **DECLARATION OF INTERESTS**

483 The authors declare no competing interests.

#### 484 **REFERENCES**

485 Bessho, Y., Shibata, R., Sekine, S.-i., Murayama, K., Higashijima, K., Hori-  
486 Takemoto, C., Shirouzu, M., Kuramitsu, S., and Yokoyama, S. (2007). Structural basis  
487 for functional mimicry of long-variable-arm tRNA by transfer-messenger RNA. *Proc.*  
488 *Natl. Acad. Sci.* *104*, 8293-8298.

489 Burroughs, A.M., and Aravind, L. (2016). RNA damage in biological conflicts  
490 and the diversity of responding RNA repair systems. *Nucleic Acids Res.* *44*, 8525-  
491 8555.

492 Chan, P.P., Cozen, A.E., and Lowe, T.M. (2011). Discovery of permuted and  
493 recently split transfer RNAs in Archaea. *Genome Biology* *12*, R38.

494 Chen, X., Quinn, A.M., and Wolin, S.L. (2000). Ro ribonucleoproteins  
495 contribute to the resistance of *Deinococcus radiodurans* to ultraviolet irradiation.  
496 *Genes Dev.* *14*, 777-782.

497 Chen, X., Sim, S., Wurtmann, E.J., Feke, A., and Wolin, S.L. (2014). Bacterial  
498 noncoding Y RNAs are widespread and mimic tRNAs. *RNA* *20*, 1715-1724.

499 Chen, X., Taylor, David W., Fowler, Casey C., Galan, Jorge E., Wang, H.-W., and  
500 Wolin, Sandra L. (2013). An RNA Degradation Machine Sculpted by Ro Autoantigen  
501 and Noncoding RNA. *Cell* *153*, 166-177.

502 Chen, X., Wurtmann, E.J., Van Batavia, J., Zybaïlov, B., Washburn, M.P., and  
503 Wolin, S.L. (2007). An ortholog of the Ro autoantigen functions in 23S rRNA  
504 maturation in *D. radiodurans*. *Genes Dev.* *21*, 1328-1339.

505 Colussi, T.M., Costantino, D.A., Hammond, J.A., Ruehle, G.M., Nix, J.C., and Kieft,  
506 J.S. (2014). The structural basis of transfer RNA mimicry and conformational  
507 plasticity by a viral RNA. *Nature* *511*, 366-369.

508 Das, U., and Shuman, S. (2013). 2' -Phosphate cyclase activity of RtcA: a  
509 potential rationale for the operon organization of RtcA with an RNA repair ligase  
510 RtcB in *Escherichia coli* and other bacterial taxa. *RNA* *19*, 1355-1362.



511 Dreher, T.W. (2009). Role of tRNA-like structures in controlling plant virus  
512 replication. *Virus Res.* *139*, 217-229.

513 Emsley, P., and Cowtan, K. (2004). Coot: model-building tools for molecular  
514 graphics. *Acta Crystallogr. D* *60*, 2126-2132.

515 Englert, M., Sheppard, K., Aslanian, A., Yates, J.R., and Söll, D. (2011). Archaeal  
516 3' -phosphate RNA splicing ligase characterization identifies the missing  
517 component in tRNA maturation. *Proc. Natl. Acad. Sci.* *108*, 1290-1295.

518 Filipowicz, W., Strugala, K., Konarska, M., and Shatkin, A.J. (1985). Cyclization  
519 of RNA 3'-terminal phosphate by cyclase from HeLa cells proceeds via formation of  
520 N(3')pp(5')A activated intermediate. *Proc Natl Acad Sci U S A* *82*, 1316-1320.

521 Fuchs, G., Stein, A.J., Fu, C., Reinisch, K.M., and Wolin, S.L. (2006). Structural  
522 and biochemical basis for misfolded RNA recognition by the Ro autoantigen. *Nat.*  
523 *Struct. Mol. Biol.* *13*, 1002-1009.

524 Giegé, R., and Eriani, G. (2014). Transfer RNA Recognition and  
525 Aminoacylation by Synthetases. In *eLS* (John Wiley & Sons, Ltd).

526 Goujon, M., McWilliam, H., Li, W., Valentin, F., Squizzato, S., Paern, J., and  
527 Lopez, R. (2010). A new bioinformatics analysis tools framework at EMBL–EBI.  
528 *Nucleic Acids Res.* *38*, W695-W699.

529 Green, C.D., Long, K.S., Shi, H., and Wolin, S.L. (1998). Binding of the 60-kDa  
530 Ro autoantigen to Y RNAs: evidence for recognition in the major groove of a  
531 conserved helix. *RNA* *4*, 750-765.

532 Gutmann, S., Haebel, P.W., Metzinger, L., Sutter, M., Felden, B., and Ban, N.  
533 (2003). Crystal structure of the transfer-RNA domain of transfer-messenger RNA in  
534 complex with SmpB. *Nature* 424, 699-703.

535 Keiler, K.C. (2015). Mechanisms of ribosome rescue in bacteria. *Nat Rev*  
536 *Micro* 13, 285-297.

537 Köhn, M., Lederer, M., Wächter, K., and Hüttelmaier, S. (2010). Near-infrared  
538 (NIR) dye-labeled RNAs identify binding of ZBP1 to the noncoding Y3-RNA. *RNA* 16,  
539 1420-1428.

540 Levitt, M. (1969). Detailed Molecular Model for Transfer Ribonucleic Acid.  
541 *Nature* 224, 759-763.

542 Liu, C., and Xiong, Y. (2014). Electron Density Sharpening as a General  
543 Technique in Crystallographic Studies. *J. Mol. Biol.* 426, 980-993.

544 Maruyama, S., Sugahara, J., Kanai, A., and Nozaki, H. (2010). Permuted tRNA  
545 Genes in the Nuclear and Nucleomorph Genomes of Photosynthetic Eukaryotes. *Mol.*  
546 *Biol. Evol.* 27, 1070-1076.

547 McCoy, A.J., Grosse-Kunstleve, R.W., Adams, P.D., Winn, M.D., Storoni, L.C., and  
548 Read, R.J. (2007). Phaser crystallographic software. *J. Appl. Crystallogr.* 40, 658-674.

549 Milligan, J.F., Groebe, D.R., Witherell, G.W., and Uhlenbeck, O.C. (1987).  
550 Oligoribonucleotide synthesis using T7 RNA polymerase and synthetic DNA  
551 templates. *Nucleic Acids Res.* 15, 8783-8798.

552 Popow, J., Englert, M., Weitzer, S., Schleiffer, A., Mierzwa, B., Mechtler, K.,  
553 Trowitzsch, S., Will, C.L., Lührmann, R., Söll, D., *et al.* (2011). HSPC117 Is the  
554 Essential Subunit of a Human tRNA Splicing Ligase Complex. *Science* 331, 760.

555           Rosenstein, S.P., and Been, M.D. (1990). Self-cleavage of hepatitis delta virus  
556 genomic strand RNA is enhanced under partially denaturing conditions.

557 *Biochemistry* 29, 8011-8016.

558           Sheldrick, G. (2008). A short history of SHELX. *Acta Crystallogr. A* 64, 112-  
559 122.

560           Sievers, F., Wilm, A., Dineen, D., Gibson, T.J., Karplus, K., Li, W., Lopez, R.,  
561 McWilliam, H., Remmert, M., Söding, J., *et al.* (2011). Fast, scalable generation of  
562 high - quality protein multiple sequence alignments using Clustal Omega. *Mol. Syst.*  
563 *Biol.* 7.

564           Sim, S., Weinberg, D.E., Fuchs, G., Choi, K., Chung, J., and Wolin, S.L. (2009).  
565 The Subcellular Distribution of an RNA Quality Control Protein, the Ro Autoantigen,  
566 Is Regulated by Noncoding Y RNA Binding. *Molecular Biology of the Cell* 20, 1555-  
567 1564.

568           Sim, S., and Wolin, S.L. (2018). Bacterial Y RNAs: Gates, Tethers and tRNA  
569 Mimics. *Microbiology Spectrum*, in press.

570           Sim, S., Yao, J., Weinberg, D.E., Niessen, S., Yates, J.R., and Wolin, S.L. (2012).  
571 The zipcode-binding protein ZBP1 influences the subcellular location of the Ro 60-  
572 kDa autoantigen and the noncoding Y3 RNA. *RNA* 18, 100-110.

573           Soma, A., Onodera, A., Sugahara, J., Kanai, A., Yachie, N., Tomita, M.,  
574 Kawamura, F., and Sekine, Y. (2007). Permuted tRNA Genes Expressed via a Circular  
575 RNA Intermediate in *Cyanidioschyzon merolae*. *Science* 318,  
576 450.

577 Stein, A.J., Fuchs, G., Fu, C., Wolin, S.L., and Reinisch, K.M. (2005). Structural  
578 Insights into RNA Quality Control: The Ro Autoantigen Binds Misfolded RNAs via Its  
579 Central Cavity. *Cell* *121*, 529-539.

580 Sunwoo, H., Dinger, M.E., Wilusz, J.E., Amaral, P.P., Mattick, J.S., and Spector,  
581 D.L. (2009). MEN  $\epsilon / \beta$  nuclear-retained non-coding RNAs are up-regulated upon  
582 muscle differentiation and are essential components of paraspeckles. *Genome Res.*  
583 *19*, 347-359.

584 Tanaka, N., Meineke, B., and Shuman, S. (2011). RtcB, a Novel RNA Ligase, Can  
585 Catalyze tRNA Splicing and HAC1 mRNA Splicing in Vivo. *J. Biol. Chem.* *286*, 30253-  
586 30257.

587 Tanaka, N., and Shuman, S. (2011). RtcB Is the RNA Ligase Component of an  
588 Escherichia coli RNA Repair Operon. *J. Biol. Chem.* *286*, 7727-7731.

589 Temmel, H., Müller, C., Sauert, M., Vesper, O., Reiss, A., Popow, J., Martinez, J.,  
590 and Moll, I. (2017). The RNA ligase RtcB reverses MazF-induced ribosome  
591 heterogeneity in Escherichia coli. *Nucleic Acids Res.* *45*, 4708-4721.

592 Vagin, A.A., Steiner, R.A., Lebedev, A.A., Potterton, L., McNicholas, S., Long, F.,  
593 and Murshudov, G.N. (2004). REFMAC5 dictionary: organization of prior chemical  
594 knowledge and guidelines for its use. *Acta Crystallogr. D* *60*, 2184-2195.

595 Walker, S.C., Avis, J.M., and Conn, G.L. (2003). General plasmids for producing  
596 RNA in vitro transcripts with homogeneous ends. *Nucleic Acids Res.* *31*, e82-e82.

597 Wilusz, J.E., Freier, S.M., and Spector, D.L. (2008). 3' End Processing of a  
598 Long Nuclear-Retained Noncoding RNA Yields a tRNA-like Cytoplasmic RNA. *Cell*  
599 *135*, 919-932.

600 Wolin, S.L., Belair, C., Boccitto, M., Chen, X., Sim, S., Taylor, D.W., and Wang, H.-  
601 W. (2013). Non-coding Y RNAs as tethers and gates. *RNA Biology* 10, 1602-1608.  
602 Zhang, J., and Ferré-D'Amaré, R.A. (2016). The tRNA Elbow in Structure,  
603 Recognition and Evolution. *Life* 6.  
604

605 Table 1 Data collection and refinement statistics (See also Figure S1)

| <b>Data collection</b>                                  | YrlA Tetraloop                  | YrlA Tetraloop 3C     |
|---------------------------------------------------------|---------------------------------|-----------------------|
| Space group                                             | C222 <sub>1</sub>               | P6 <sub>3</sub>       |
| Cell dimensions                                         |                                 |                       |
| <i>a, b, c</i> (Å)                                      | 59.41, 147.11, 101.57           | 146.46, 146.46, 52.53 |
| $\alpha, \beta, \gamma$ (°)                             | 90, 90, 90                      | 90, 90, 120           |
| Resolution (Å)                                          | 50.0-3.0 (3.1-3.0) <sup>a</sup> | 50.0-4.3 (4.37-4.30)  |
| <i>R</i> <sub>merge</sub> (%)                           | 9.6 (80.2)                      | 9.6 (>100)            |
| <i>I</i> / $\sigma$ ( <i>I</i> )                        | 13.8 (2.3)                      | 14.4 (1.0)            |
| Completeness (%)                                        | 98.0 (97.0)                     | 99.1 (97.4)           |
| Redundancy                                              | 4.1 (4.1)                       | 5.7 (4.8)             |
| CC <sub>1/2</sub>                                       | 1.00(0.97)                      | 1.00(0.67)            |
| <b>Refinement</b>                                       |                                 |                       |
| Resolution (Å)                                          | 30.8-3.0 (3.1-3.0)              |                       |
| No. reflections                                         | 9072 (843)                      |                       |
| <i>R</i> <sub>work</sub> / <i>R</i> <sub>free</sub> (%) | 21.3/23.4 (43.3/47.2)           |                       |
| No. atoms                                               |                                 |                       |
| RNA                                                     | 1742                            |                       |
| Ion                                                     | 12                              |                       |
| Water                                                   | 4                               |                       |
| Mean <i>B</i> -factors (Å <sup>2</sup> )                |                                 |                       |
| RNA                                                     | 150                             |                       |
| Ion                                                     | 198                             |                       |
| Water                                                   | 129                             |                       |
| R.m.s. deviations                                       |                                 |                       |
| Bond lengths (Å)                                        | 0.008                           |                       |
| Bond angles (°)                                         | 1.3                             |                       |

606 <sup>a</sup>Values in parentheses are for highest-resolution shell.

607
